# Supplementary material for: High-performance Li-ion battery driven by a hybrid Li storage mechanism in a three-dimensional architectured ZnTiO3–CeO2 microsphere anode
Source: Royal Society of Chemistry journal article supplement (doi:10.1039/d1dt03588f), 2021-11-22
Supplement: d1dt03588f1.pdf [file d1dt03588f1.pdf]

## Supporting Information

### High-performance Li-ion battery driven by hybrid Li storage mechanism in three-dimensional architected ZnTiO<sub>3</sub>/CeO<sub>2</sub> microsphere anode

Xue-Zhong Li <sup>a,d</sup>, Yu-Rui Ji <sup>a,c</sup>, Wu-Yi Chai <sup>c</sup>, Zhenxing Huo <sup>e</sup>, Ting-Feng Yi <sup>a,c,d,\*</sup>, Ying Xie <sup>b,\*</sup>

<sup>a</sup> School of Materials Science and Engineering, Northeastern University, Shenyang 110819, PR China

<sup>b</sup> Key Laboratory of Functional Inorganic Material Chemistry, Ministry of Education, School of Chemistry and Materials Science, Heilongjiang University, Harbin, 150080, PR China

<sup>c</sup> School of Resources and Materials, Northeastern University at Qinhuangdao, Qinhuangdao 066004, PR China

<sup>d</sup> Key Laboratory of Dielectric and Electrolyte Functional Material Hebei Province, Qinhuangdao 066004, PR China

<sup>e</sup> China United Network Communications Group Co., Ltd, Beijing 100032, PR China

**\* Corresponding author.**

**E-mail address:**

[tfyihit@163.com](mailto:tfyihit@163.com) (Ting-Feng Yi)

[xieying@hlju.edu.cn](mailto:xieying@hlju.edu.cn) (Ying Xie)

## 1. Materials synthesis

For the synthesis of  $\text{ZnTiO}_3\text{-CeO}_2$  heterostructure, 2.19 g  $\text{Zn}(\text{CH}_3\text{COO})_2$  were dispersed in 50 mL ethylene glycol with continuous magnetic stirring for 24 h (solution A). At the same time, 3.4 g  $\text{C}_{16}\text{H}_{36}\text{O}_4\text{Ti}$  was dripped into 50ml anhydrous ethanol and stirred for 12h to make it mix evenly (solution B). Then, solution A was slowly poured into solution B, and added  $\text{Ce}(\text{NO}_3)_3 \cdot 6\text{H}_2\text{O}$  until uniformly mixed (solution C). The quality of  $\text{Ce}(\text{NO}_3)_3 \cdot 6\text{H}_2\text{O}$  is quantified according to the proportion of the coating, the coated samples of 3 wt%, 6 wt% and 9 wt%, were recorded as ZTO-CO1, ZTO-CO2 and ZTO-CO3 in order. Subsequently, the as-prepared solution C was transferred into a 100 mL Teflon-lined stainless-steel autoclave after stirring for 24 h and heated at 180 °C for 6 h. The obtained product was collected and washed with ethanol for several times and subsequently dried at 70 °C overnight. Then, the as-prepared  $\text{ZnTiO}_3\text{-CeO}_2$  composites were calcined at 600 °C for 3 h under atmosphere. Meanwhile, bare  $\text{ZnTiO}_3$  materials as the baseline were prepared by a similar synthetic route without  $\text{Ce}(\text{NO}_3)_3 \cdot 6\text{H}_2\text{O}$ .

## 2. Material characterization and electrochemical measurement

The crystal structure of pure  $\text{ZnTiO}_3$  and  $\text{ZnTiO}_3\text{-CeO}_2$  were carried on X-ray powder diffraction (XRD) with Cu Ka radiation. The morphologies of the two synthesized materials were characterized via field emission scanning electron microscopy (ZEISS-SUPRA55 SAPHIRE) and transmission electron microscopy (TEM, JEOL-2100F). The electrodes were fabricated by mixing 70 wt% active

materials, 20 wt% acetylene black and 10 wt% polyvinylidene, respectively, in NMP solution. The obtained slurries were coated onto copper foil, and then dried at 100 °C under vacuum for 12 h. The CR2025 coin cells were assembled in an argon-filled glove box by using lithium foil as the counter electrode and Celgard 2500 membrane as the separator and containing a liquid electrolyte of 1M LiPF<sub>6</sub> in EC and DMC (1:1, v/v). The batteries tests were performed on between 0.01 and 3.0 V. Cycle voltammetry (CV) at 0.5 mV s<sup>-1</sup> between 0.01 and 3.0 V and electrochemical impedance spectroscopy (EIS) in a frequency range of 10 mHz–100 kHz with AC voltage amplitude of 5mV were conducted on the VSP electrochemical workstation (Bio-logic, FRA).

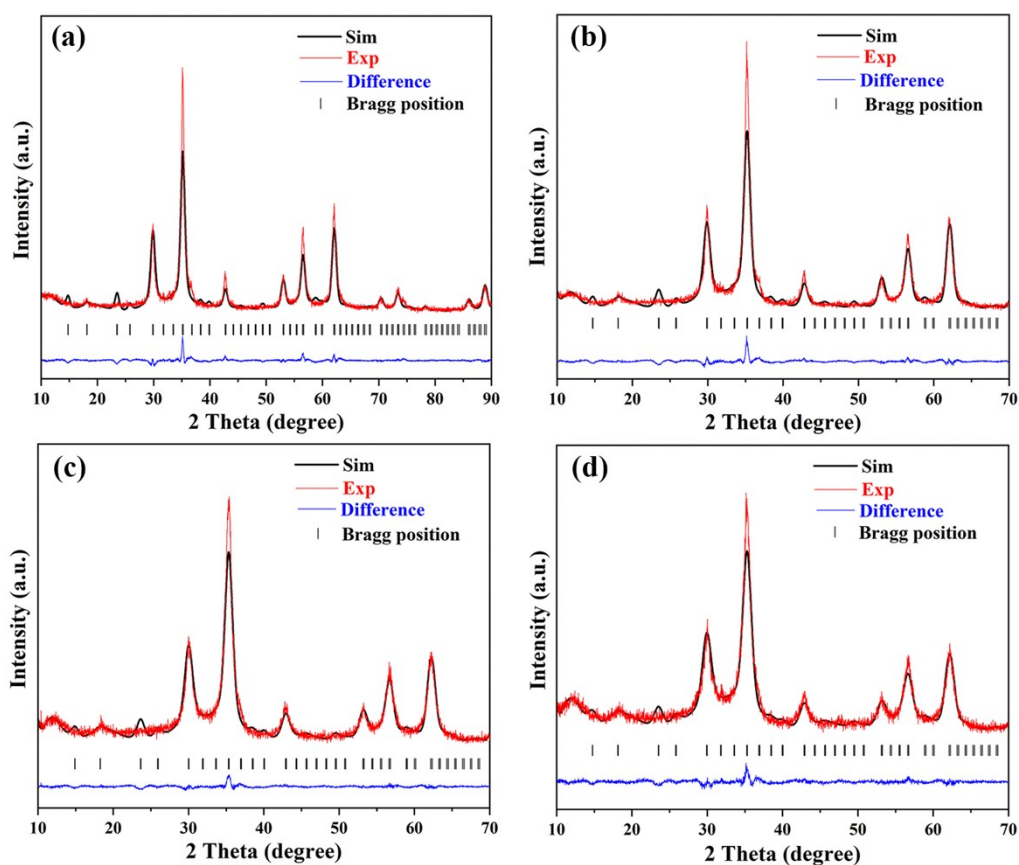

**Figure S1. XRD Rietveld refinement profiles of (a) ZTO, (b) ZTO-CO1, (c) ZTO-CO2 and (d) ZTO-CO3.**

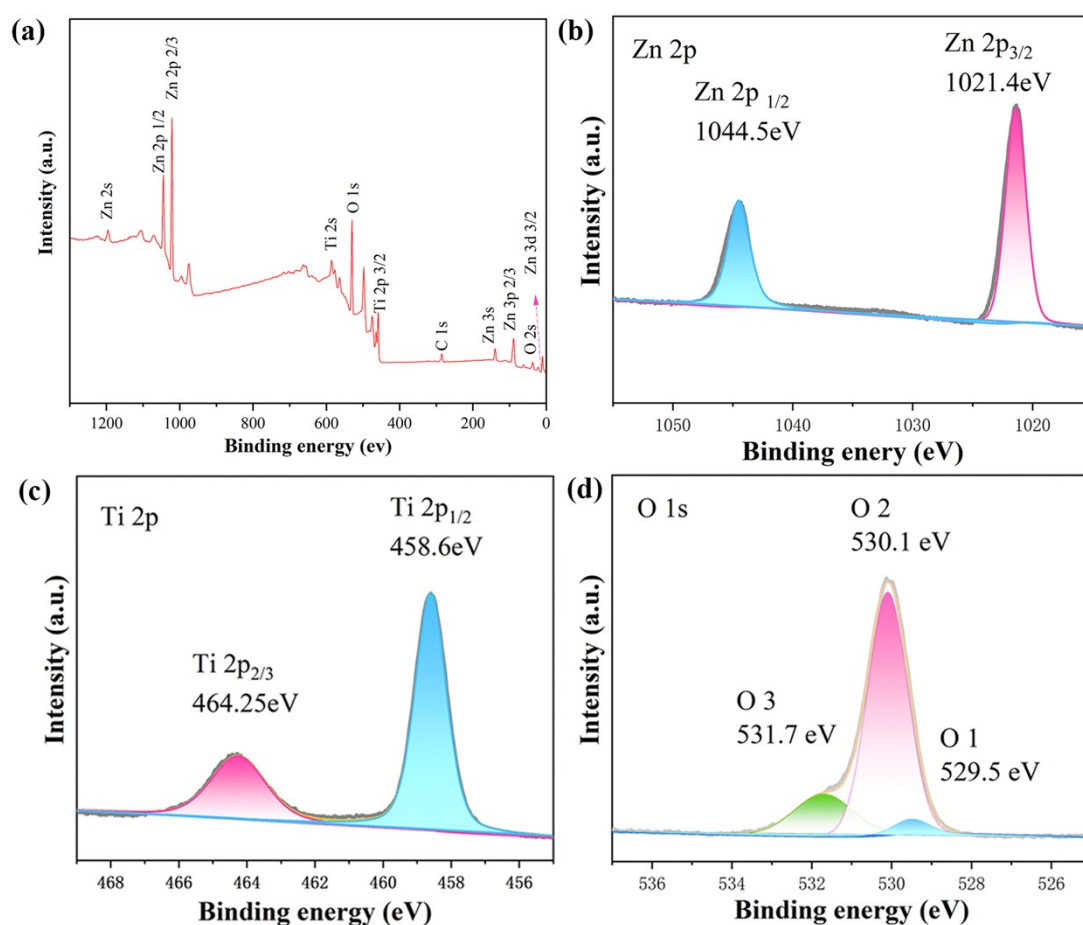

**Figure S2. (a) XPS survey spectrum of ZTO and corresponding high-resolution XPS spectra of (b) Zn 2p, (c) Ti 2p and (d) O1s.**

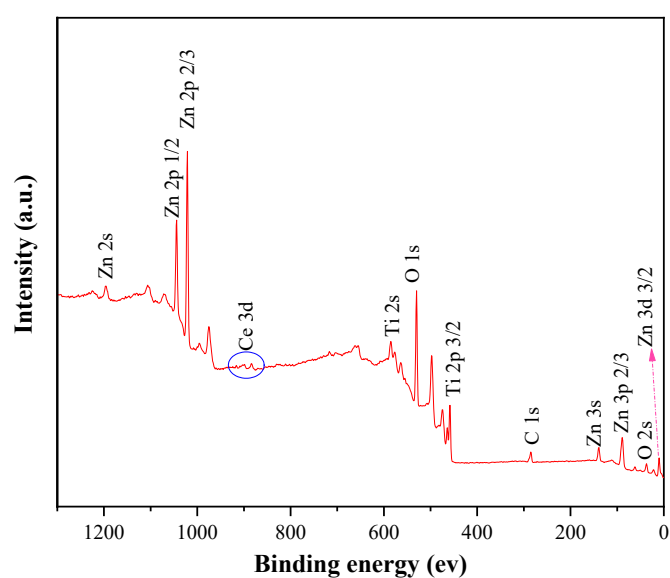

**Figure S3. XPS survey spectrum of ZTO-CO<sub>2</sub> composite.**

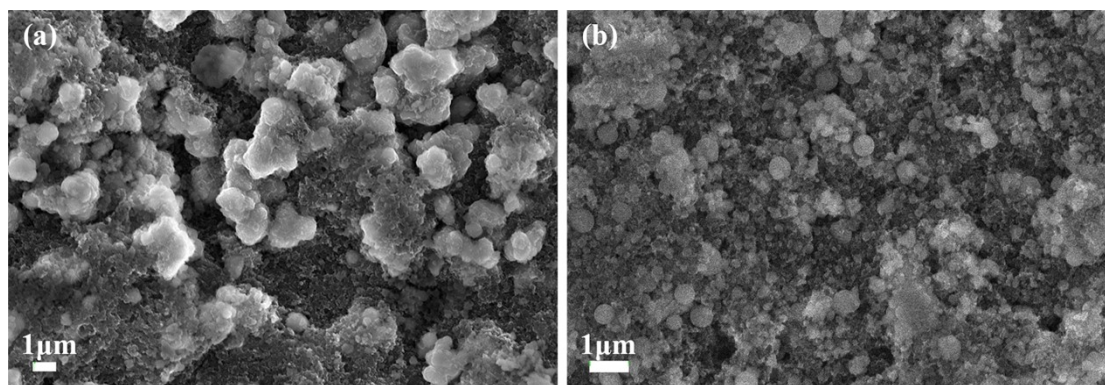

**Figure S4. SEM images of (a) ZTO and (b) ZTO-CO<sub>2</sub> cycled at 0.5 A g<sup>-1</sup> after 500 cycles.**
